# Supplementary material
Source: HighWire-hosted journal article supplement (https://bmjopenquality.bmj.com/highwire/filestream/135992/field_highwire_adjunct_files/0/ds6104.docx)
Supplement: ds6104.docx [file ds6104.docx]

**Supplementary Table 1. Demographics of Patients in Baseline and Post-Education Chart Samples**

|  | Baseline | Post-Education |
| --- | --- | --- |
| Age (years) | 60 | 61 |
| Females/Males (%) | 52/48 | 48/52 |
| Disease Duration (years) | 9.6 | 16.0 |
| Hemoglobin A1c (%) | 7.47 | 7.49 |
| BMI (kilograms/meters2) | 34.1 | 35.5 |
| Coronary Artery Disease (%) | 15 | 13 |
| Hypertension (%) | 75 | 78 |
| Dyslipidemia (%) | 70 | 71 |
| Obesity, BMI > 30 (%) | 42 | 34 |

**Supplementary Table 2. Baseline and Post-Education Rates of Compliance with Patient-Centered Quality Measures**

| Measure | Baseline  (n = 300 charts; %) | Post-Education  (n = 300 charts; %) | Δ (%) |
| --- | --- | --- | --- |
| Counseling for medication risks/benefits | 55 | 83 | 28 |
| Counseling for medication adherence | 58 | 71 | 13 |
| Counseling for lifestyle modifications | 74 | 82 | 8 |
| Assessment of medication side effects | 47 | 58 | 11 |

**Supplementary Table 3. Baseline and Post-Education Patient Outcomes**

| Measure | Baseline  (n = 300 charts) | Post-Education  (n = 300 charts) | Δ (%) |
| --- | --- | --- | --- |
| Patient adherence to diabetes medications (%) | 28 | 52 | 24 |
| Mean change in hemoglobin A1c from first to last visit (%) | -0.12  First visit: 7.47  Last visit: 7.35 | -0.28  First visit: 7.49  Last visit: 7.21 | -0.16 |
| Mean change in BMI from first to last visit | 0  First visit: 34.1  Last visit: 34.1 | -2.1  First visit: 35.5  Last visit: 33.4 | -2.1 |

Note: For Hb A1c and BMI, the negative change values in the last column reflect greater reductions and more favorable patient outcomes in the post-education versus baseline period.

**Supplementary Table 4. Baseline and Post-Education Responses to Survey Questions Related to Patient-Centered Performance Measures**

| Measure | Baseline  (n =30; %) | Post-Education  (n = 30; %) | Δ (%) |
| --- | --- | --- | --- |
| Correct answers to knowledge-based questions regarding outcomes of treatment for type 2 diabetes | 51 | 68 | +17 |
| Proportion of participants who indicated a high level of confidence in counseling patients about various aspects of type 2 diabetes medication use and risks/benefits, and self-management | 36 | 45 | +9 |
| Proportion of participants who indicated “time constraints” as a significant barrier to performing patient-centered clinical measures | 53 | 27 | -26 |
